# Supplementary material for: The evolution of the North Atlantic Meridional Overturning Circulation since 1980
Source: Springer Nature journal article supplement (doi:10.1038/s43017-022-00263-2), 2022-03-01
Supplement: 43017_2022_263_MOESM1_ESM.pdf [file 43017_2022_263_MOESM1_ESM.pdf]

**Supplementary information**

---

**The evolution of the North Atlantic  
Meridional Overturning Circulation since  
1980**

---

In the format provided by the  
authors and unedited

## 1 **Appendix: Data used**

2 All AMOC reconstructions and proxies are listed in Table S1.

### 3 **Reanalyses**

4 The ensemble mean and standard deviation were calculated from reanalyses participating in ref<sup>1</sup>, with the exception of ORAS5  
5 and GECCO2 which were shown to have problems replicating AMOC variability.

### 6 **Forced models**

7 The ensemble mean and standard deviation were calculated from forced models participating in OMIP2<sup>2</sup>. Models used were  
8 those available to download: CESM2, CNRM-CM6-1, EC-Earth3, FGOALS-f3-L, NorESM2-LM. Results from another forced  
9 model study<sup>3</sup> are also shown in Figure S1 at 26.5°N (data from other latitudes was not available). There is qualitative agreement  
10 between the two ensembles, however the second ensemble has a less pronounced peak around year 2006.

### 11 **Coupled models**

12 The coupled models were taken from CMIP6 preindustrial experiments<sup>4-13</sup>, historical experiments<sup>14-33</sup> and experiments with  
13 the future scenario ssp585<sup>34-47</sup>

| Type          | Name                        | Method                                                                                       | Latitude  | Depth/density space | years used |
|---------------|-----------------------------|----------------------------------------------------------------------------------------------|-----------|---------------------|------------|
| Observations  | OVIDE <sup>48</sup>         | TW from ocean floats and satellite altimetry, Ekman from reanalysis winds                    | 40-60°N   | density             | 1993-2016  |
| Observations  | 45°N <sup>49</sup>          | TW from ocean floats and satellite altimetry                                                 | 45°N      | density and depth   | 1993-2018  |
| Observations  | Surf flux <sup>49</sup>     | Implied AMOC from water mass transformation, fluxes from reanalyses                          | 45°N      | density             | 1988-2015  |
| Observations  | 41°N <sup>50</sup>          | TW from ocean floats and satellite altimetry, Ekman from reanalysis winds                    | 41°N      | depth               | 1993-2017  |
| Observations  | RAPID <sup>51,52</sup>      | TW from moorings, boundary currents from submarine cable, Ekman from satellite winds         | 26.5°N    | depth               | 2005-2018  |
| Observations  | 26.5°N <sup>53</sup>        | Extension of RAPID using relationships with altimetry                                        | 26.5°N    | depth               | 1993-2019  |
| Reanalyses    | Reanalyses <sup>1</sup>     | Ensemble mean and spread from ensemble of reanalyses                                         | 26.5,50°N | depth               | 1993-2016  |
| Forced models | Forced models <sup>54</sup> | Ensemble mean and spread from ensemble of ocean models                                       | 26.5,50°N | depth               | 1960-2019  |
| Proxies       | LSD <sup>55</sup>           | Labrador sea density (1000-2500m, 35-60°W, 50-65°N mean) using EN4 <sup>56</sup>             | subpolar  | -                   | 1980-2020  |
| Proxies       | SS <sup>57</sup>            | Sortable silt, proxy for deep west boundary current                                          | 35°N      | -                   | 1980-2003  |
| Proxies       | SL <sup>58,59</sup>         | Sea level difference on east coast of USA (26-34°N minus 36.5-42°N)                          | intergyre | -                   | 1980-2016  |
| Proxies       | AMV1 <sup>60</sup>          | SST (0-60°N, 50°W-10°E mean minus global mean) using EN4 <sup>56</sup>                       | -         | -                   | 1980-2020  |
| Proxies       | AMV2 <sup>61</sup>          | SST (40-60°N, 50°W-10°E mean minus global mean) using EN4 <sup>56</sup>                      | -         | -                   | 1980-2020  |
| Proxies       | SST <sup>62</sup>           | SST in subpolar gyre region (as in ref <sup>63</sup> ) minus NH mean using EN4 <sup>56</sup> | -         | -                   | 1980-2020  |
| Proxies       | TSUB <sup>64,65</sup>       | Temperature at 400m (50-60N, 30-50W mean minus 35-46N, 40-70W) using EN4 <sup>56</sup>       | -         | -                   | 1980-2020  |
| Proxies       | UOHC <sup>64,65</sup>       | OHC (0-700m, 50-60N, 30-50W mean minus 35-46N, 40-70W mean) using EN4 <sup>56</sup>          | -         | -                   | 1980-2020  |

**Supplementary Table 1.** AMOC reconstructions and proxies used in this study. Here TW is thermal wind and OHC ocean heat content.

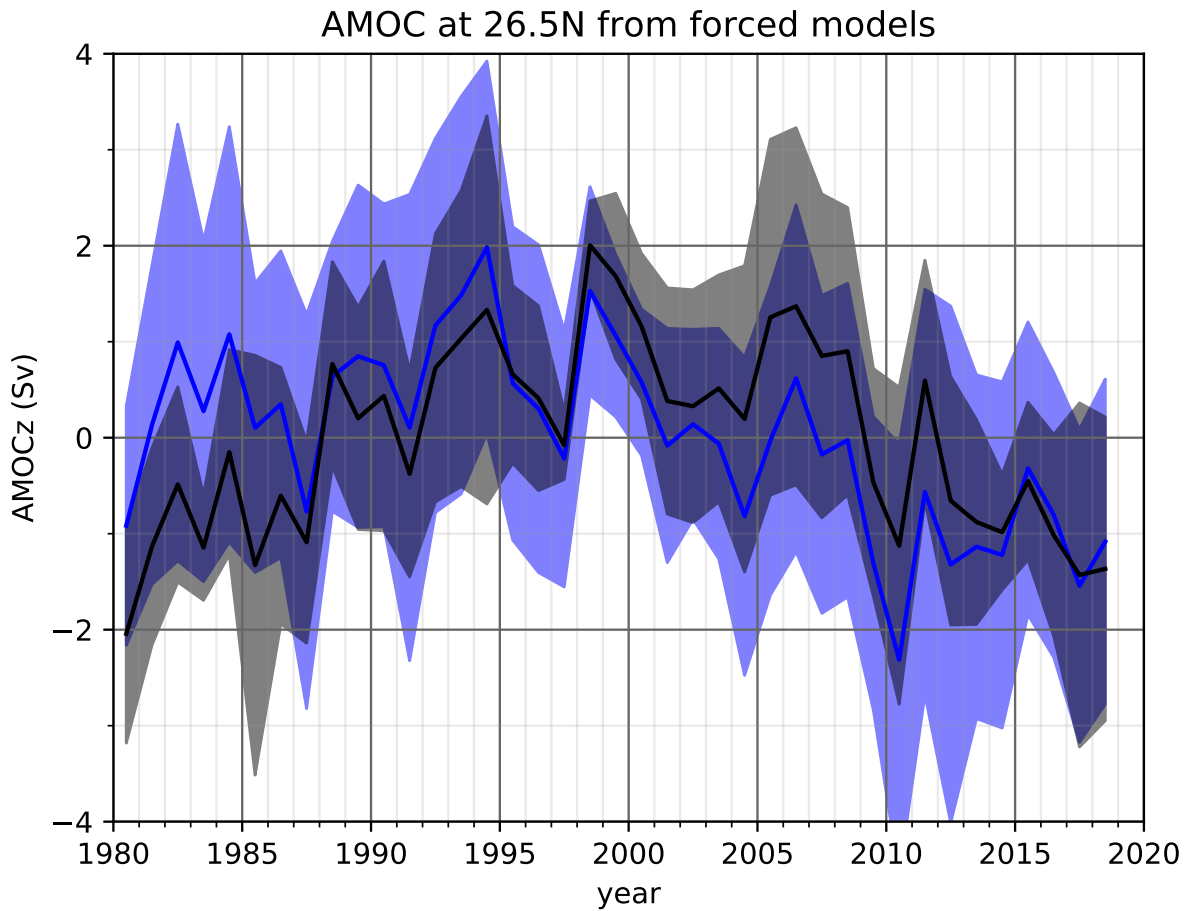

**Supplementary Figure 1.** Annual mean AMOC anomalies at 26.5°N from forced models participating in OMIP2<sup>2</sup> (black), and from forced models from ref<sup>3</sup>. Lines are ensemble means with shading showing 2 times the standard deviation across models.

## References

- 14 **1.** Jackson, L. C. *et al.* The mean state and variability of the north atlantic circulation: A perspective from ocean reanalyses. *J. Geophys. Res. Ocean.* **124**, 9141–9170, DOI: <https://doi.org/10.1029/2019JC015210> (2019).
- 15
- 16
- 17 **2.** Tsujino, H. *et al.* Evaluation of global ocean–sea-ice model simulations based on the experimental protocols of the Ocean Model Intercomparison Project phase 2 (OMIP-2). *Geosci. Model. Dev. Discuss.* **2020**, 1–86, DOI: [10.5194/gmd-2019-363](https://doi.org/10.5194/gmd-2019-363) (2020).
- 18
- 19
- 20 **3.** Chassignet, E. P. *et al.* Impact of horizontal resolution on global ocean–sea ice model simulations based on the experimental protocols of the ocean model intercomparison project phase 2 (omip-2). *Geosci. Model. Dev.* **13**, 4595–4637, DOI: [10.5194/gmd-13-4595-2020](https://doi.org/10.5194/gmd-13-4595-2020) (2020).
- 21
- 22
- 23 **4.** for Space Studies (NASA/GISS), N. G. I. Nasa-giss giss-e2-2-g model output prepared for cmip6 cmip picontrol, DOI: [10.22033/ESGF/CMIP6.7382](https://doi.org/10.22033/ESGF/CMIP6.7382) (2019).
- 24
- 25 **5.** Wieners, K.-H. *et al.* Mpi-m mpi-esm1.2-lr model output prepared for cmip6 cmip picontrol, DOI: [10.22033/ESGF/CMIP6.6675](https://doi.org/10.22033/ESGF/CMIP6.6675) (2019).
- 26
- 27 **6.** Swart, N. C. *et al.* Ccma canesm5 model output prepared for cmip6 cmip picontrol, DOI: [10.22033/ESGF/CMIP6.3673](https://doi.org/10.22033/ESGF/CMIP6.3673) (2019).
- 28

- 29 7. Volodin, E. *et al.* Inm inm-cm5-0 model output prepared for cmip6 cmip picontrl, DOI: [10.22033/ESGF/CMIP6.5081](https://doi.org/10.22033/ESGF/CMIP6.5081)  
30 (2019).
- 31 8. Dix, M. *et al.* Csiro-arccss access-cm2 model output prepared for cmip6 cmip picontrl, DOI: [10.22033/ESGF/CMIP6.4311](https://doi.org/10.22033/ESGF/CMIP6.4311)  
32 (2019).
- 33 9. Li, L. Cas fgoals-g3 model output prepared for cmip6 cmip picontrl, DOI: [10.22033/ESGF/CMIP6.3448](https://doi.org/10.22033/ESGF/CMIP6.3448) (2019).
- 34 10. Tatebe, H. & Watanabe, M. Miroc miroc6 model output prepared for cmip6 cmip picontrl, DOI: [10.22033/ESGF/CMIP6.  
35 5711](https://doi.org/10.22033/ESGF/CMIP6.5711) (2018).
- 36 11. Bethke, I. *et al.* Ncc norcpm1 model output prepared for cmip6 cmip picontrl, DOI: [10.22033/ESGF/CMIP6.10896](https://doi.org/10.22033/ESGF/CMIP6.10896)  
37 (2019).
- 38 12. Danabasoglu, G., Lawrence, D., Lindsay, K., Lipscomb, W. & Strand, G. Ncar cesm2 model output prepared for cmip6  
39 cmip picontrl, DOI: [10.22033/ESGF/CMIP6.7733](https://doi.org/10.22033/ESGF/CMIP6.7733) (2019).
- 40 13. Yukimoto, S. *et al.* Mri mri-esm2.0 model output prepared for cmip6 cmip picontrl, DOI: [10.22033/ESGF/CMIP6.6900](https://doi.org/10.22033/ESGF/CMIP6.6900)  
41 (2019).
- 42 14. Jungclaus, J. *et al.* Mpi-m mpi-esm1.2-hr model output prepared for cmip6 cmip historical, DOI: [10.22033/ESGF/CMIP6.  
43 6594](https://doi.org/10.22033/ESGF/CMIP6.6594) (2019).
- 44 15. Chai, Z. Cas cas-esm1.0 model output prepared for cmip6 cmip historical, DOI: [10.22033/ESGF/CMIP6.3353](https://doi.org/10.22033/ESGF/CMIP6.3353) (2020).
- 45 16. Dix, M. *et al.* Csiro-arccss access-cm2 model output prepared for cmip6 cmip historical, DOI: [10.22033/ESGF/CMIP6.4271](https://doi.org/10.22033/ESGF/CMIP6.4271)  
46 (2019).
- 47 17. Ziehn, T. *et al.* Csiro access-esm1.5 model output prepared for cmip6 cmip historical, DOI: [10.22033/ESGF/CMIP6.4272](https://doi.org/10.22033/ESGF/CMIP6.4272)  
48 (2019).
- 49 18. Tatebe, H. & Watanabe, M. Miroc miroc6 model output prepared for cmip6 cmip historical, DOI: [10.22033/ESGF/CMIP6.  
50 5603](https://doi.org/10.22033/ESGF/CMIP6.5603) (2018).
- 51 19. Swart, N. C. *et al.* Cccma canesm5 model output prepared for cmip6 cmip historical, DOI: [10.22033/ESGF/CMIP6.3610](https://doi.org/10.22033/ESGF/CMIP6.3610)  
52 (2019).
- 53 20. Park, S. & Shin, J. Snu sam0-unicon model output prepared for cmip6 cmip historical, DOI: [10.22033/ESGF/CMIP6.7789](https://doi.org/10.22033/ESGF/CMIP6.7789)  
54 (2019).
- 55 21. Danabasoglu, G. Ncar cesm2-waccm-fv2 model output prepared for cmip6 cmip historical, DOI: [10.22033/ESGF/CMIP6.  
56 11298](https://doi.org/10.22033/ESGF/CMIP6.11298) (2019).
- 57 22. Volodin, E. *et al.* Inm inm-cm4-8 model output prepared for cmip6 cmip historical, DOI: [10.22033/ESGF/CMIP6.5069](https://doi.org/10.22033/ESGF/CMIP6.5069)  
58 (2019).
- 59 23. Danabasoglu, G. Ncar cesm2-waccm model output prepared for cmip6 cmip historical, DOI: [10.22033/ESGF/CMIP6.10071](https://doi.org/10.22033/ESGF/CMIP6.10071)  
60 (2019).
- 61 24. YU, Y. Cas fgoals-f3-l model output prepared for cmip6 cmip historical, DOI: [10.22033/ESGF/CMIP6.3355](https://doi.org/10.22033/ESGF/CMIP6.3355) (2019).
- 62 25. Yukimoto, S. *et al.* Mri mri-esm2.0 model output prepared for cmip6 cmip historical, DOI: [10.22033/ESGF/CMIP6.6842](https://doi.org/10.22033/ESGF/CMIP6.6842)  
63 (2019).
- 64 26. Seland, y. *et al.* Ncc noresm2-lm model output prepared for cmip6 cmip historical, DOI: [10.22033/ESGF/CMIP6.8036](https://doi.org/10.22033/ESGF/CMIP6.8036)  
65 (2019).
- 66 27. Neubauer, D. *et al.* Hammoz-consortium mpi-esm1.2-ham model output prepared for cmip6 cmip historical, DOI:  
67 [10.22033/ESGF/CMIP6.5016](https://doi.org/10.22033/ESGF/CMIP6.5016) (2019).
- 68 28. Danabasoglu, G. Ncar cesm2-fv2 model output prepared for cmip6 cmip historical, DOI: [10.22033/ESGF/CMIP6.11297](https://doi.org/10.22033/ESGF/CMIP6.11297)  
69 (2019).
- 70 29. Bethke, I. *et al.* Ncc norcpm1 model output prepared for cmip6 cmip historical, DOI: [10.22033/ESGF/CMIP6.10894](https://doi.org/10.22033/ESGF/CMIP6.10894)  
71 (2019).
- 72 30. Wieners, K.-H. *et al.* Mpi-m mpi-esm1.2-lr model output prepared for cmip6 cmip historical, DOI: [10.22033/ESGF/  
73 CMIP6.6595](https://doi.org/10.22033/ESGF/CMIP6.6595) (2019).
- 74 31. Volodin, E. *et al.* Inm inm-cm5-0 model output prepared for cmip6 cmip historical, DOI: [10.22033/ESGF/CMIP6.5070](https://doi.org/10.22033/ESGF/CMIP6.5070)  
75 (2019).

- 76 **32.** Danabasoglu, G. Ncar cesm2 model output prepared for cmip6 cmip historical, DOI: [10.22033/ESGF/CMIP6.7627](https://doi.org/10.22033/ESGF/CMIP6.7627) (2019).
- 77 **33.** Bentsen, M. *et al.* Ncc noesm2-mm model output prepared for cmip6 cmip historical, DOI: [10.22033/ESGF/CMIP6.8040](https://doi.org/10.22033/ESGF/CMIP6.8040)  
78 (2019).
- 79 **34.** Dix, M. *et al.* Csiro-arccss access-cm2 model output prepared for cmip6 scenariomip ssp585, DOI: [10.22033/ESGF/CMIP6.4332](https://doi.org/10.22033/ESGF/CMIP6.4332) (2019).
- 80
- 81 **35.** Seland, y. *et al.* Ncc noesm2-lm model output prepared for cmip6 scenariomip ssp585, DOI: [10.22033/ESGF/CMIP6.8319](https://doi.org/10.22033/ESGF/CMIP6.8319)  
82 (2019).
- 83 **36.** Bentsen, M. *et al.* Ncc noesm2-mm model output prepared for cmip6 scenariomip ssp585, DOI: [10.22033/ESGF/CMIP6.8321](https://doi.org/10.22033/ESGF/CMIP6.8321)  
84 (2019).
- 85 **37.** YU, Y. Cas fgoals-f3-l model output prepared for cmip6 scenariomip ssp585, DOI: [10.22033/ESGF/CMIP6.3502](https://doi.org/10.22033/ESGF/CMIP6.3502) (2019).
- 86 **38.** Li, L. Cas fgoals-g3 model output prepared for cmip6 scenariomip ssp585, DOI: [10.22033/ESGF/CMIP6.3503](https://doi.org/10.22033/ESGF/CMIP6.3503) (2019).
- 87 **39.** Ziehn, T. *et al.* Csiro access-esm1.5 model output prepared for cmip6 scenariomip ssp585, DOI: [10.22033/ESGF/CMIP6.4333](https://doi.org/10.22033/ESGF/CMIP6.4333)  
88 (2019).
- 89 **40.** Schupfner, M. *et al.* Dkrz mpi-esm1.2-hr model output prepared for cmip6 scenariomip ssp585, DOI: [10.22033/ESGF/CMIP6.4403](https://doi.org/10.22033/ESGF/CMIP6.4403)  
90 (2019).
- 91 **41.** Volodin, E. *et al.* Inm inm-cm4-8 model output prepared for cmip6 scenariomip ssp585, DOI: [10.22033/ESGF/CMIP6.12337](https://doi.org/10.22033/ESGF/CMIP6.12337)  
92 (2019).
- 93 **42.** Volodin, E. *et al.* Inm inm-cm5-0 model output prepared for cmip6 scenariomip ssp585, DOI: [10.22033/ESGF/CMIP6.12338](https://doi.org/10.22033/ESGF/CMIP6.12338)  
94 (2019).
- 95 **43.** Shiogama, H., Abe, M. & Tatebe, H. Miroc miroc6 model output prepared for cmip6 scenariomip ssp585, DOI: [10.22033/ESGF/CMIP6.5771](https://doi.org/10.22033/ESGF/CMIP6.5771) (2019).
- 96
- 97 **44.** Wieners, K.-H. *et al.* Mpi-m mpi-esm1.2-lr model output prepared for cmip6 scenariomip ssp585, DOI: [10.22033/ESGF/CMIP6.6705](https://doi.org/10.22033/ESGF/CMIP6.6705)  
98 (2019).
- 99 **45.** Yukimoto, S. *et al.* Mri mri-esm2.0 model output prepared for cmip6 scenariomip ssp585, DOI: [10.22033/ESGF/CMIP6.6929](https://doi.org/10.22033/ESGF/CMIP6.6929)  
100 (2019).
- 101 **46.** Danabasoglu, G. Ncar cesm2-waccm model output prepared for cmip6 scenariomip ssp585, DOI: [10.22033/ESGF/CMIP6.10115](https://doi.org/10.22033/ESGF/CMIP6.10115)  
102 (2019).
- 103 **47.** Swart, N. C. *et al.* Cccma canesm5 model output prepared for cmip6 scenariomip ssp585, DOI: [10.22033/ESGF/CMIP6.3696](https://doi.org/10.22033/ESGF/CMIP6.3696)  
104 (2019).
- 105 **48.** Mercier, H. *et al.* Variability of the meridional overturning circulation at the greenland–portugal ovide section from 1993  
106 to 2010. *Prog. Oceanogr.* **132**, 250 – 261, DOI: <https://doi.org/10.1016/j.pocean.2013.11.001> (2015).
- 107 **49.** Desbruyères, D., Mercier, H., Maze, G. & Daniault, N. Surface predictor of overturning circulation and heat content  
108 change in the subpolar north atlantic. *Ocean. Sci.* **15**, 809–817, DOI: [10.5194/os-15-809-2019](https://doi.org/10.5194/os-15-809-2019) (2019).
- 109 **50.** Willis, J. K. Can in situ floats and satellite altimeters detect long-term changes in atlantic ocean overturning? *geophys. res. lett.*, **37**, 106602, doi:10.1029/2010gl042372. *Geophys. Res. Lett.* **37**, L06602, DOI: [10.1029/2010GL042372](https://doi.org/10.1029/2010GL042372) (2010).
- 110
- 111 **51.** McCarthy, G. D. *et al.* Measuring the Atlantic meridional overturning circulation at 26°N. *Prog. Oceanogr.* **130**, 91–111,  
112 DOI: [10.1016/j.pocean.2014.10.006](https://doi.org/10.1016/j.pocean.2014.10.006) (2015).
- 113 **52.** Moat, B. I. *et al.* Atlantic meridional overturning circulation observed by the rapid-mocha-wbts (rapid-meridional  
114 overturning circulation and heatflux array-western boundary time series) array at 26n from 2004 to 2018 (v2018.2), DOI:  
115 [10.5285/aa57e879-4cca-28b6-e053-6c86abc02de5](https://doi.org/10.5285/aa57e879-4cca-28b6-e053-6c86abc02de5) (2020).
- 116 **53.** Sanchez-Franks, A., Frajka-Williams, E., Moat, B. I. & Smeed, D. A. A dynamically based method for estimating the  
117 atlantic meridional overturning circulation at 26n from satellite altimetry. *Ocean. Sci.* **17**, 1321–1340, DOI: [10.5194/](https://doi.org/10.5194/os-17-1321-2021)  
118 [os-17-1321-2021](https://doi.org/10.5194/os-17-1321-2021) (2021).
- 119 **54.** Tsujino, H. *et al.* JRA-55 based surface dataset for driving ocean–sea-ice models (JRA55-do). *Ocean. Model.* **130**, 79–139,  
120 DOI: [10.1016/j.ocemod.2018.07.002](https://doi.org/10.1016/j.ocemod.2018.07.002) (2018).
- 121 **55.** Robson, J., Ortega, P. & Sutton, R. A reversal of climatic trends in the North Atlantic since 2005. *Nat. Geosci.* **9**, 513–517,  
122 DOI: [10.1038/ngeo2727](https://doi.org/10.1038/ngeo2727) (2016).

- 123 **56.** Good, S. A., Martin, M. J. & Rayner, N. A. EN4: Quality controlled ocean temperature and salinity profiles and monthly  
124 objective analyses with uncertainty estimates. *J. Geophys. Res.* **118**, 6704–6716 (2013).
- 125 **57.** Thornalley, D. J. R. *et al.* Anomalously weak labrador sea convection and atlantic overturning during the past 150 years.  
126 *Nature* **556**, 227–230, DOI: [10.1038/s41586-018-0007-4](https://doi.org/10.1038/s41586-018-0007-4) (2018).
- 127 **58.** MacCarthy, G. D., Haigh, I. D., Hirschi, J. J.-M., Grist, J. P. & Smeed, D. A. Ocean impact on decadal atlantic climate  
128 variability revealed by sea-level observations. *Nature* **521**, 508–510 (2015).
- 129 **59.** Diabaté, S. T. *et al.* Western boundary circulation and coastal sea-level variability in northern hemisphere oceans. *Ocean.*  
130 *Sci.* **17**, 1449–1471, DOI: [10.5194/os-17-1449-2021](https://doi.org/10.5194/os-17-1449-2021) (2021).
- 131 **60.** Latif, M. *et al.* Reconstructing, monitoring, and predicting multidecadal-scale changes in the north atlantic thermohaline  
132 circulation with sea surface temperature. *J. Clim.* **17**, 1605–1614, DOI: [10.1175/1520-0442\(2004\)017<1605:RMAPMC>](https://doi.org/10.1175/1520-0442(2004)017<1605:RMAPMC>2.0.CO;2)  
133 [2.0.CO;2](https://doi.org/10.1175/1520-0442(2004)017<1605:RMAPMC>2.0.CO;2) (2004).
- 134 **61.** Msadek, R., Dixon, K. W., Delworth, T. L. & Hurlin, W. Assessing the predictability of the atlantic meridional overturning  
135 circulation and associated fingerprints. *Geophys. Res. Lett.* **37**, L19608, DOI: [10.1029/2010GL044517](https://doi.org/10.1029/2010GL044517) (2010).
- 136 **62.** Rahmstorf, S. *et al.* Exceptional twentieth-century slowdown in Atlantic Ocean overturning circulation. *Nat. Clim. Chang.*  
137 **5**, 475–480, DOI: [10.1038/nclimate2554](https://doi.org/10.1038/nclimate2554) (2015).
- 138 **63.** Caesar, L., Rahmstorf, S., Robinson, A., Feulner, G. & Saba, V. Observed fingerprint of a weakening atlantic ocean  
139 overturning circulation. *Nature* **556**, 191–196, DOI: [10.1038/s41586-018-0006-5](https://doi.org/10.1038/s41586-018-0006-5) (2018).
- 140 **64.** Zhang, R. Coherent surface-subsurface fingerprint of the Atlantic meridional overturning circulation. *Geophys. Res. Lett.*  
141 **35**, L20705+, DOI: [10.1029/2008gl035463](https://doi.org/10.1029/2008gl035463) (2008).
- 142 **65.** Zhang, J. & Zhang, R. On the evolution of atlantic meridional overturning circulation fingerprint and implications for  
143 decadal predictability in the north atlantic. *Geophys. Res. Lett.* **42**, 5419–5426, DOI: [10.1002/2015GL064596](https://doi.org/10.1002/2015GL064596) (2015).
